# Supplementary material
Source: MDPI journal article supplement (https://www.mdpi.com/2379-139X/7/1/3)
Supplement: s1 [file s1]

**Supplementary Table S1:** Abbreviations for the WM areas used in this study.

| <b>Name WM area</b>                     | <b>Abbreviation</b> |
|-----------------------------------------|---------------------|
| Anterior thalamic radiation             | ATR                 |
| Cortical spinal tract                   | CST                 |
| Cingulum cingulate gyrus                | CCG                 |
| Cingulum Hippo                          | cingulum Hippo      |
| Forceps Major                           | forceps major       |
| Forceps Minor                           | forceps minor       |
| Inferior fronto-occipital fasc          | IFOF                |
| Inferior longitudinal fasc              | ILF                 |
| Superior longitudinal fasc              | SLF                 |
| Uncinate fasc                           | UF                  |
| Middle cerebellar peduncle              | MCP                 |
| Corpus callosum                         | CC                  |
| Fornix                                  | fornix              |
| Medial lemniscus                        | medial lemniscus    |
| Inferior cerebellar peduncle            | ICP                 |
| Superior cerebellar peduncle            | SCP                 |
| Cerebral peduncle                       | CP                  |
| Internal capsule                        | IC                  |
| Anterior corona radiata                 | ACR                 |
| Superior corona radiata                 | SCR                 |
| Posterior corona radiata                | PCR                 |
| Posterior thalamic radiation            | PTR                 |
| Sagittal stratum                        | SS                  |
| External capsule                        | EC                  |
| Superior fronto-occipital<br>fasciculus | SFOC                |

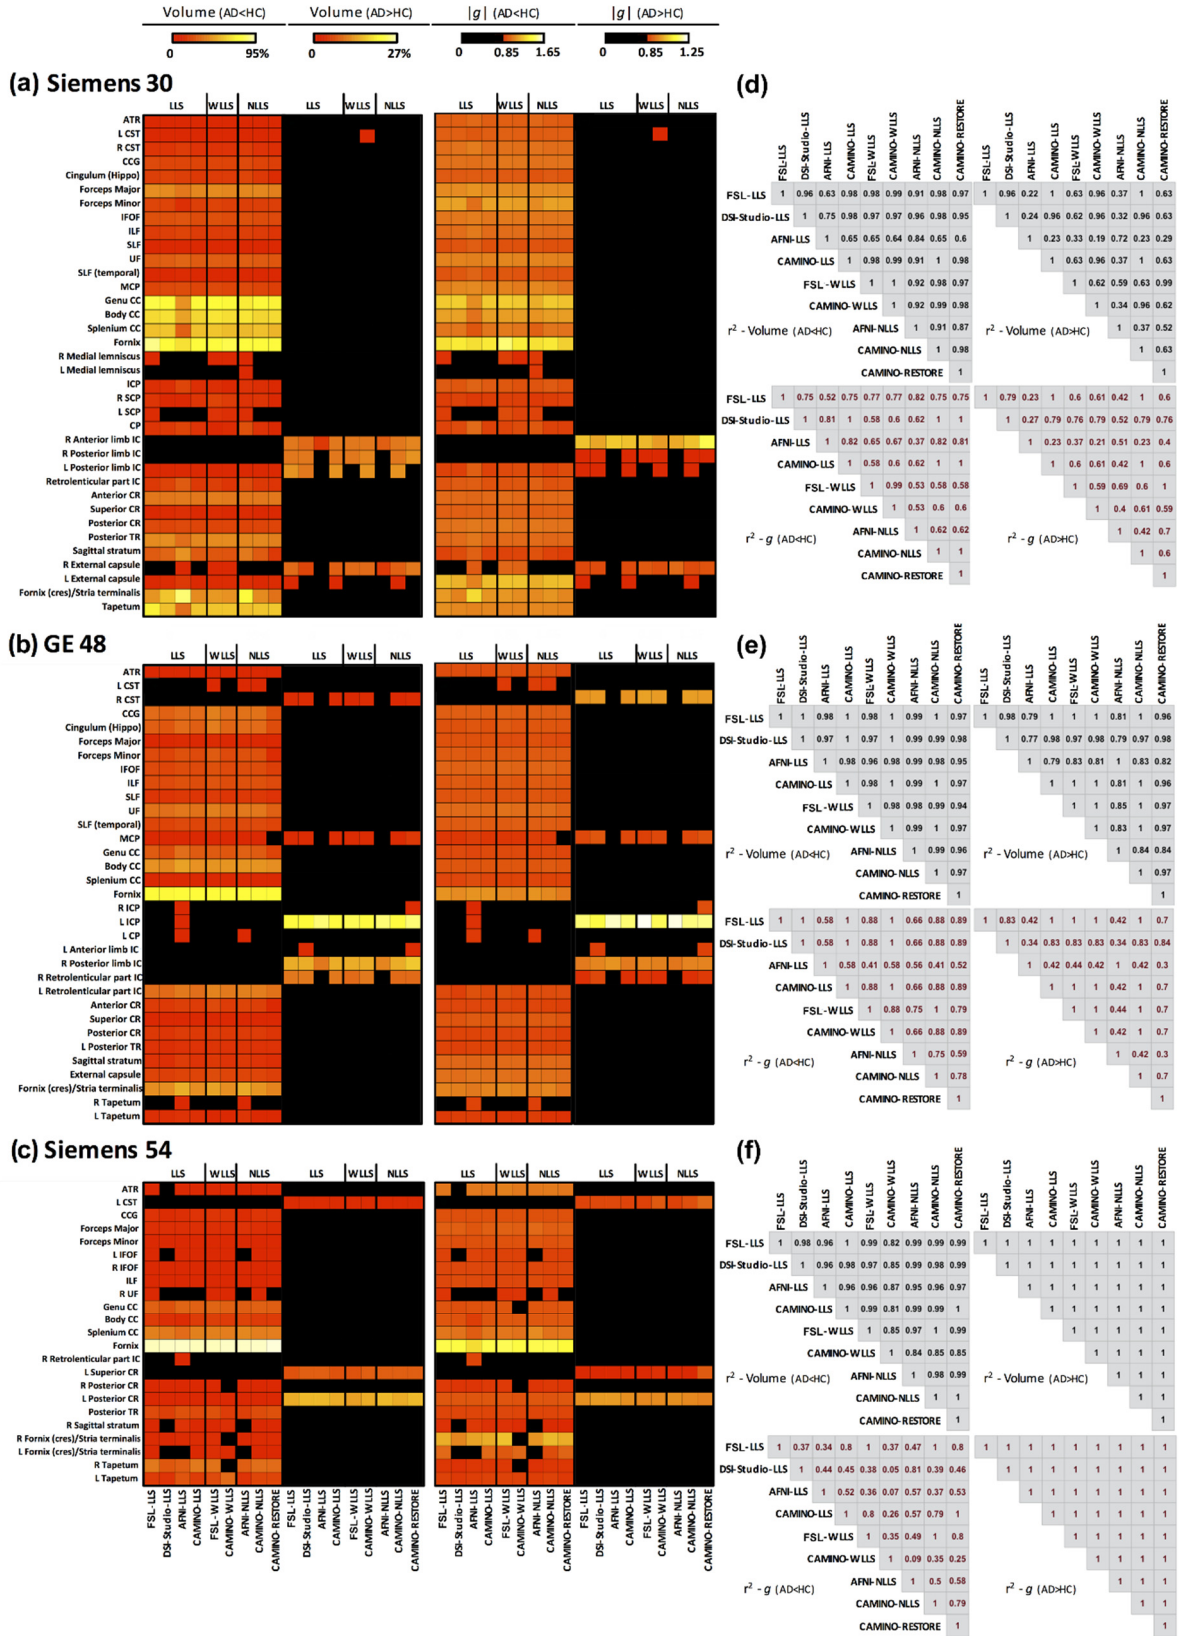

Supplementary figure S1

AD vs HC post-hoc comparison for all fitting algorithms for cluster volumes and  $g$  index with the relative pairs linear fits correlations for (a) SI30, (b) GE48, and (c) SI54. Significant clusters with  $|g| > 0.85$  and size  $> 100$  voxels.

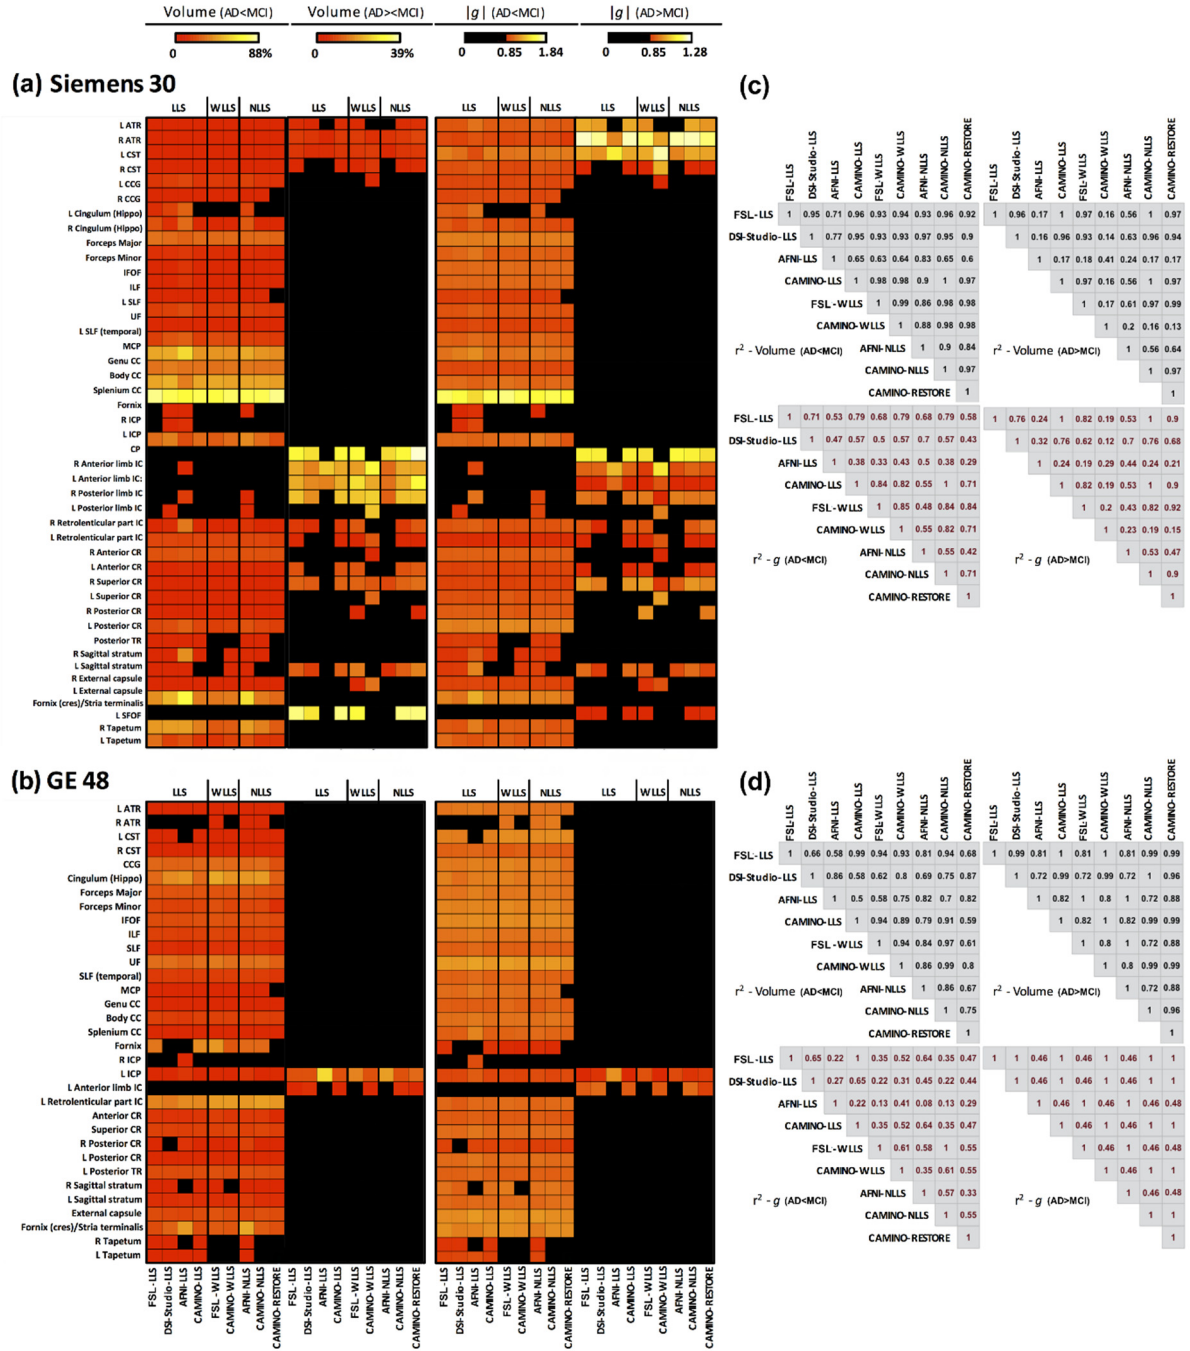

Supplementary figure S2

AD *vs* MCI post-hoc comparison for all fitting algorithms for cluster volumes and  $g$  index with the relative pairs linear fits correlations for (a) SI30, (b) GE48. No differences between these two groups were detected by SI54. Significant clusters with  $|g| > 0.85$  and size  $> 100$  voxels.

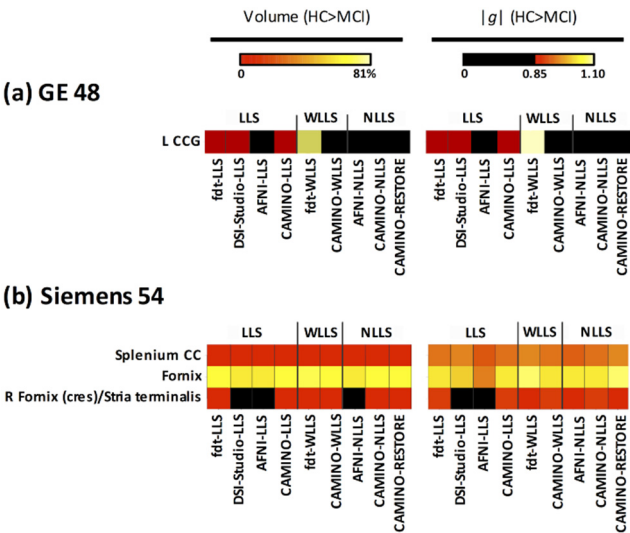

### Supplementary figure S3

MCI *vs* HC post-hoc comparison for all fitting algorithms for cluster volumes and  $g$  index with the relative pairs linear fits correlations for (a) GE48 and (b) SI54. No differences between these two groups were detected by SI30. Significant clusters with  $|g| > 0.85$  and size  $> 100$  voxels.

## (a) Siemens 30

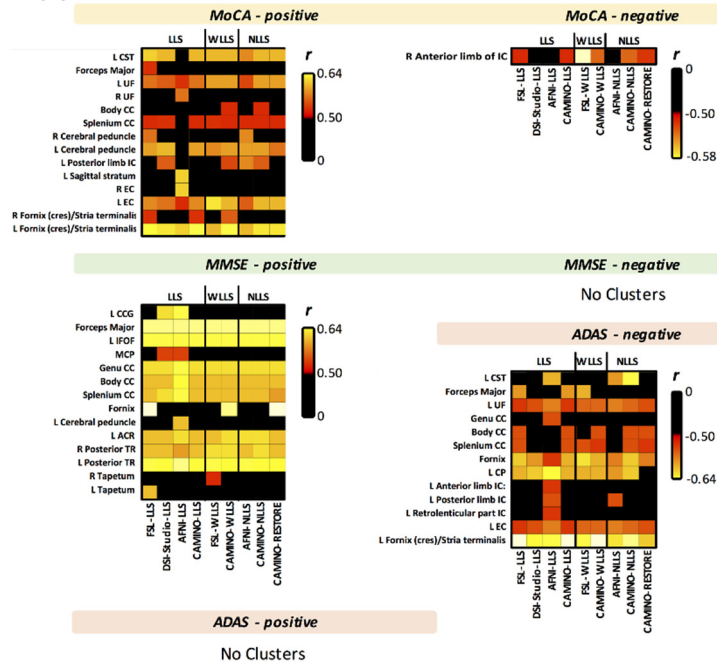

## (b) GE 48

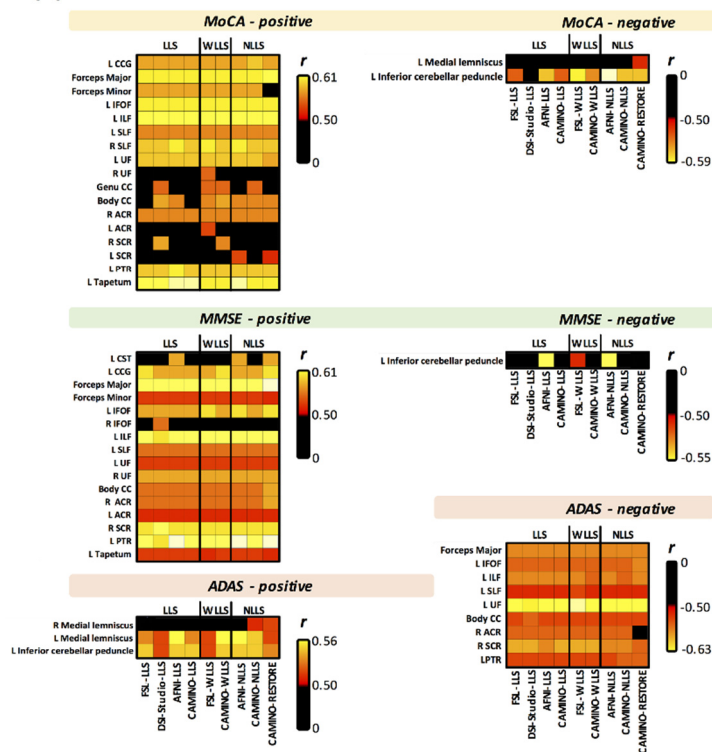

## Supplementary figure S4

Voxel-based Spearman's correlations between cognitive scores (MoCA, MMSE, and ADAS) and the FA values from all DTI fits and acquisitions. Significant clusters with  $|r| > 0.50$  and size  $> 100$ . No correlations were found for Siemens 54.
